# Supplementary material for: Conventional Therapies Do Not Prolong the Prognosis of Hepatocellular Carcinoma Patients with Extrahepatic Metastases under Receiving of Tyrosine Kinase Inhibitors
Source: MDPI journal article supplement (doi:10.3390/cancers14030752), 2022-01-31
Supplement: s1 [file s1]

## Supplementary Materials

**Table S1.** Background data of patients in the treatment and no treatment groups.

|                                        | Treatment group        | No treatment group     | <i>p</i> -Value |
|----------------------------------------|------------------------|------------------------|-----------------|
| Number                                 | 96                     | 31                     |                 |
| Age (years old)                        | 69.6 (25.4–87.0)       | 73.0 (40.4–86.7)       | 0.189           |
| Men                                    | 78 (81.3%)             | 24 (77.4%)             | 0.641           |
| HBV                                    | 14 (14.6%)             | 5 (16.1%)              | 0.834           |
| HCV                                    | 52 (54.2%)             | 17 (54.8%)             | 0.948           |
| HBV+HCV                                | 3 (3.1%)               | 0 (0.0%)               | 0.319           |
| Alcoholic                              | 13 (13.5%)             | 2 (6.5%)               | 0.288           |
| NASH                                   | 8 (8.3%)               | 4 (12.9%)              | 0.449           |
| Others                                 | 6 (6.3%)               | 3 (9.7%)               | 0.518           |
| FIB-4 index                            | 4.85 (0.48–27.8)       | 7.73 (1.44–39.5)       | 0.145           |
| Child–Pugh score                       | 5.5 (5 – 11)           | 8 (5 –13)              | <0.001          |
| ALBI score                             | –2.35 (–3.26 to –0.81) | –1.59 (–2.87 to –0.62) | <0.001          |
| AFP (ng/mL)                            | 107 (1–671940)         | 204 (1–245405)         | 0.818           |
| DCP (mAU/mL)                           | 506 (10–1084600)       | 1261 (22–562056)       | 0.040           |
| Frequency of multiple intrahepatic HCC | 70 (72.9%)             | 25 (80.6%)             | 0.389           |
| Maximum size of intrahepatic HCC (mm)  | 38 (0–154)             | 58 (0–140)             | 0.003           |
| Vascular invasion                      | 55 (57.3%)             | 25 (80.6%)             | 0.019           |
| Hepatic TNM                            | 3 (0–4)                | 4 (0–4)                | 0.013           |
| Performance status                     | 0 (0–4)                | 0 (0–2)                | 0.665           |
| Bone metastasis alone                  | 32 (33.3%)             | 4 (12.9%)              | 0.028           |
| Lung metastasis alone                  | 13 (13.5%)             | 12 (38.7%)             | 0.002           |
| Lymph node metastasis alone            | 16 (16.7%)             | 13 (41.9%)             | 0.004           |
| another organ metastasis               | 5 (5.2%)               | 0 (0.0%)               | 0.195           |
| Multiple metastases                    | 30 (31.3%)             | 2 (6.5%)               | 0.006           |

AFP,  $\alpha$ -fetoprotein; DCP, des- $\gamma$ -carboxy prothrombin; HBV, hepatitis B virus; HCV, hepatitis C virus ; NASH, nonalcoholic steatohepatitis ; TNM, tumor-node-metastasis.

**Table S2.** Contents of TKI and conventional therapies.

|               | TKI group        |                                               |                                     | Non-TKI group          |                                        | p-Value             |
|---------------|------------------|-----------------------------------------------|-------------------------------------|------------------------|----------------------------------------|---------------------|
|               | TKI alone        | TKI plus conventional therapies               | Use of pembrolizumab or ramucirumab | Conventional therapies | TKI use before extrahepatic metastases |                     |
| n             | 29               | 36                                            | 2 (excluded)                        | 25                     | 4 (excluded)                           |                     |
| SOR           | 24               | 17                                            | 1                                   | 0                      | 4                                      | 0.003 <sup>a)</sup> |
| LEN           | 4                | 12                                            | 0                                   | 0                      | 0                                      | 0.069 <sup>a)</sup> |
|               |                  | 7                                             |                                     |                        |                                        |                     |
| Multiple TKIs | 1<br>SOR+LEN (1) | SOR+REG (1)<br>SOR+LEN (5)<br>SOR+REG+LEN (1) | 1<br>SOR+REG (1)                    | 0                      | 0                                      | 0.051 <sup>a)</sup> |
| TACE/TAI      |                  | 11                                            |                                     | 11                     |                                        | 0.282 <sup>b)</sup> |
| RT            |                  | 12                                            |                                     | 7                      |                                        | 0.658 <sup>b)</sup> |
| TACE/TAI +RT  |                  | 9                                             |                                     | 2                      |                                        | 0.089 <sup>b)</sup> |
| other         |                  | 4                                             |                                     | 5                      |                                        | 0.336 <sup>b)</sup> |

LEN, lenvatinib; REG, regorafenib; RT, radiation therapy; SOR, sorafenib; TACE, transcatheter arterial chemoembolization; TAI, transhepatic arterial infusion; other includes surgical resection and oral UFT (tegafur/uracil); TKI, Tyrosine kinase inhibitor. a) Comparison of TKI between TKI alone and TKI plus conventional therapies. b) Comparison of conventional therapies between TKI group and non-TKI group.

**Table S3.** Background data of patients in TKI and non-TKI groups.

|                                        | TKI group              | Non-TKI group          | p-Value |
|----------------------------------------|------------------------|------------------------|---------|
| Number                                 | 65                     | 25                     |         |
| Age (years old)                        | 70.3 (25.4–85.9)       | 69.7 (49.6–87.0)       | 0.961   |
| Men                                    | 54 (83.1%)             | 19 (76.0%)             | 0.442   |
| FIB4-index                             | 4.77 (0.48–27.8)       | 4.97 (1.74–25.7)       | 0.121   |
| Child–Pugh score                       | 5 (5–11)               | 6 (5–10)               | 0.021   |
| ALBI score                             | –2.41 (–3.25 to –0.90) | –2.03 (–3.26 to –0.81) | 0.016   |
| AFP (ng/mL)                            | 63 (1–128650)          | 403 (2–671940)         | 0.140   |
| DCP (mAU/mL)                           | 395 (10–1084600)       | 1932 (16–562056)       | 0.077   |
| Frequency of multiple intrahepatic HCC | 45 (69.2%)             | 20 (80.0%)             | 0.307   |
| Maximum size of intrahepatic HCC (mm)  | 35 (0–154)             | 41 (0–138)             | 0.114   |
| Vascular invasion                      | 30 (46.2%)             | 19 (76.0%)             | 0.011   |
| Hepatic TNM                            | 3 (0–4)                | 4 (0–4)                | 0.008   |
| Performance status                     | 0 (0–3)                | 0 (0–4)                | 0.250   |

AFP,  $\alpha$ -fetoprotein; DCP, des- $\gamma$ -carboxy prothrombin; TKI, Tyrosine kinase inhibitor; TNM, tumor-node-metastasis. .

**Table S4.** Background data of patients who started TKI after diagnosis of metastases.

|                                        | TKI group              | Non-TKI group          | p-Value |
|----------------------------------------|------------------------|------------------------|---------|
| Number                                 | 56                     | 25                     |         |
| Age (years old)                        | 70.0 (45.9–85.9)       | 69.7 (49.6–87.0)       | 0.862   |
| Men                                    | 46 (82.1%)             | 19 (76.0%)             | 0.521   |
| FIB-4 index                            | 4.19 (0.48–18.0)       | 4.97 (1.74–25.7)       | 0.076   |
| Child–Pugh score                       | 5 (5–11)               | 6 (5–10)               | 0.035   |
| ALBI score                             | –2.42 (–3.25 to –0.90) | –2.03 (–3.26 to –0.81) | 0.016   |
| AFP (ng/mL)                            | 84 (1–128650)          | 403 (2–671940)         | 0.142   |
| DCP (mAU/mL)                           | 442 (10–1084600)       | 1932 (16–562056)       | 0.125   |
| Frequency of multiple intrahepatic HCC | 38 (67.9%)             | 20 (80.0%)             | 0.263   |
| Maximum size of intrahepatic HCC (mm)  | 35 (0–154)             | 41 (0–138)             | 0.123   |
| Vascular invasion                      | 26 (46.4%)             | 19 (76.0%)             | 0.013   |
| Hepatic TNM                            | 3 (0–4)                | 4 (0–4)                | 0.009   |
| Performance status                     | 0 (0–3)                | 0 (0–4)                | 0.214   |

AFP,  $\alpha$ -fetoprotein; DCP, des- $\gamma$ -carboxy prothrombin; TKI, Tyrosine kinase inhibitor; TNM, tumor-node-metastasis.

**Table S5.** Background data of Child-Pugh A and B patients who started TKI after diagnosis of metastases.

|                                        | Child-Pugh A              |                           |         | Child-Pugh B              |                           |         |
|----------------------------------------|---------------------------|---------------------------|---------|---------------------------|---------------------------|---------|
|                                        | TKI                       | Non-TKI                   | P-value | TKI                       | Non-TKI                   | P-value |
| Number                                 | 46                        | 15                        |         | 9                         | 9                         |         |
| Age (years old)                        | 69.6<br>(45.9–85.9)       | 75.5<br>(61.8–83.4)       | 0.115   | 73.9<br>(51.9–83.4)       | 63.7<br>(49.6–87.0)       | 0.301   |
| Men                                    | 37 (80.4%)                | 11 (73.3%)                | 0.560   | 8 (88.9%)                 | 7 (77.8%)                 | 0.527   |
| FIB-4 index                            | 3.75<br>(0.48–18.0)       | 4.43<br>(1.74–14.3)       | 0.303   | 6.95<br>(3.75–17.2)       | 12.3<br>(3.58–25.7)       | 0.174   |
| ALBI score                             | –2.49<br>(–3.25 to –1.83) | –2.38<br>(–3.26 to –1.65) | 0.182   | –1.92<br>(–2.21 to –1.19) | –1.77<br>(–2.44 to –0.90) | 0.640   |
| AFP (ng/mL)                            | 57<br>(1–128650)          | 155<br>(4–369127)         | 0.248   | 504<br>(2–123578)         | 577<br>(2–671940)         | 0.659   |
| DCP (mAU/mL)                           | 352<br>(10–1084600)       | 166<br>(16–562056)        | 0.541   | 575<br>(23–82003)         | 5952<br>(24–45363)        | 0.825   |
| Frequency of multiple intrahepatic HCC | 30 (65.2%)                | 10 (66.7%)                | 0.918   | 7 (77.8%)                 | 9 (100%)                  | 0.134   |
| Maximum size of intrahepatic HCC (mm)  | 26 (0–154)                | 41 (0–125)                | 0.322   | 52 (0–127)                | 53 (24–138)               | 0.750   |
| Vascular invasion                      | 19 (41.3%)                | 10 (66.7%)                | 0.088   | 6 (66.7%)                 | 8 (88.9%)                 | 0.257   |
| Hepatic TNM                            | 3 (0–4)                   | 3 (0–4)                   | 0.144   | 3 (0–4)                   | 4 (3–4)                   | 0.048   |
| Performance status                     | 0 (0–3)                   | 0 (0–4)                   | 0.736   | 0 (0–0)                   | 0 (0–3)                   | 0.066   |

AFP,  $\alpha$ -fetoprotein; DCP, des- $\gamma$ -carboxy prothrombin; TKI, Tyrosine kinase inhibitor; TNM, tumor-node-metastasis.

**Table S6.** Background data of patients who meet the REFLECT criteria (REFLECT IN) and do not meet the criteria (REFLECT OUT).

|                                        | REFLECT IN                |                           |         | REFLECT OUT               |                           |         |
|----------------------------------------|---------------------------|---------------------------|---------|---------------------------|---------------------------|---------|
|                                        | TKI                       | TKI plus conventional     | p-value | TKI                       | TKI plus conventional     | p-value |
| Number                                 | 14                        | 21                        |         | 15                        | 15                        |         |
| Age (years old)                        | 72.2 (25.4–84.2)          | 69.1 (49.9–80.9)          | 0.893   | 71.1 (51.9–85.9)          | 67.5 (57.4–85.1)          | 0.788   |
| Men                                    | 12 (85.7%)                | 16 (76.2%)                | 0.490   | 13 (86.7%)                | 13 (86.7%)                | 1.000   |
| FIB4-index                             | 3.81 (1.56–8.3)           | 3.60 (1.84–8.52)          | 0.731   | 8.63 (0.95–18.0)          | 6.29 (0.48–25.7)          | 0.443   |
| Child–Pugh score                       | 5 (5–6)                   | 5 (5–6)                   | 0.213   | 6 (5–11)                  | 5 (5–8)                   | 0.145   |
| ALBI score                             | –2.61<br>(–3.14 to –2.14) | –2.50<br>(–3.25 to –1.83) | 0.730   | –1.86<br>(–3.20 to –0.90) | –2.41<br>(–3.02 to –1.19) | 0.086   |
| AFP (ng/mL)                            | 79 (1–127956)             | 14 (1–2132)               | 0.252   | 504 (2–128650)            | 70 (1–123578)             | 0.372   |
| DCP (mAU/mL)                           | 30<br>(10–5061)           | 216<br>(15–9129)          | 0.029   | 1832<br>(10–1084600)      | 464<br>(21–63989)         | 0.089   |
| Frequency of multiple intrahepatic HCC | 10 (71.4%)                | 12 (57.1%)                | 0.392   | 11 (73.3%)                | 12 (80.0%)                | 0.666   |
| Maximum size of intrahepatic HCC (mm)  | 23 (0–57)                 | 14 (0–78)                 | 0.804   | 63 (25–154)               | 35 (0–120)                | 0.008   |
| Vascular invasion                      | 4 (28.6%)                 | 4 (19.0%)                 | 0.511   | 13 (86.7%)                | 9 (60.0%)                 | 0.099   |
| Hepatic TNM                            | 3 (0–4)                   | 2 (0–4)                   | 0.593   | 4 (2–4)                   | 3 (0–4)                   | 0.139   |
| Performance status                     | 0 (0–1)                   | 0 (0–1)                   | 0.331   | 0 (0–3)                   | 0 (0–2)                   | 0.544   |
| HCC occupation ≥50% of the liver       | 0 (0%)                    | 0 (0%)                    | -       | 4 (26.7%)                 | 1 (6.7%)                  | 0.142   |
| Bile duct invasion                     | 0 (0%)                    | 0 (0%)                    | -       | 3 (20.0%)                 | 3 (20.0%)                 | 1.000   |
| Main portal vein invasion (Vp4)        | 0 (0%)                    | 0 (0%)                    | -       | 1 (6.7%)                  | 0 (0%)                    | 0.309   |
| Sorafenib                              | 12                        | 13                        | 0.126   | 12                        | 4                         | 0.003   |
| Lenvatinib                             | 2                         | 5                         | 0.384   | 2                         | 7                         | 0.046   |
| Multiple TKI                           | 0                         | 3                         | 0.139   | 1                         | 4                         | 0.142   |

AFP,  $\alpha$ -fetoprotein; DCP, des- $\gamma$ -carboxy prothrombin; TKI, Tyrosine kinase inhibitor; TNM, tumor-node-metastasis.

**Table S7.** Background data of patients with lung or bone metastases.

|                                        | Bone metastasis alone  | Lung metastasis alone  | p-value |
|----------------------------------------|------------------------|------------------------|---------|
| Number                                 | 32                     | 13                     |         |
| Age (years old)                        | 69.7 (56.3–85.9)       | 67.1 (25.4–83.7)       | 0.582   |
| Men                                    | 27 (84.4%)             | 11 (84.6%)             | 0.984   |
| FIB-4 index                            | 5.84 (0.95–27.8)       | 5.30 (1.56–25.6)       | 1.000   |
| Child–Pugh score                       | 6 (5–9)                | 6 (5–7)                | 0.925   |
| ALBI score                             | –2.26 (–3.25 to –1.09) | –2.47 (–3.20 to –1.45) | 0.903   |
| AFP (ng/mL)                            | 128 (1–36917)          | 247 (3–671940)         | 0.367   |
| DCP (mAU/mL)                           | 1545 (21–1084600)      | 4059 (10–43699)        | 0.802   |
| Frequency of multiple intrahepatic HCC | 24 (75.0%)             | 11 (84.6%)             | 0.482   |
| Maximum size of intrahepatic HCC (mm)  | 43 (0–154)             | 41 (0–138)             | 0.573   |
| Vascular invasion                      | 20 (62.5%)             | 8 (61.5%)              | 0.952   |
| Hepatic TNM                            | 4 (0–4)                | 4 (0–4)                | 0.674   |

---

|                    |            |            |       |
|--------------------|------------|------------|-------|
| Performance status | 0 (0–4)    | 0 (0–2)    | 0.428 |
| TKI use            | 23 (71.9%) | 10 (76.9%) | 0.729 |

AFP,  $\alpha$ -fetoprotein; DCP, des- $\gamma$ -carboxy prothrombin; TKI, Tyrosine kinase inhibitor; TNM, tumor-node-metastasis.
